# Supplementary material for: Zeolite Y Films as Ideal Platform for Evaluation of Third-Order Nonlinear Optical Quantum Dots
Source: Hindawi journal article supplement (doi:10.1155/2016/9519362), 2016-01-01
Supplement: f1 [file 9519362.f1.pdf]

# **Supplementary Information**

## **Zeolite Y Films as Ideal Platform for Evaluation of Third-Order Nonlinear Optical Quantum Dots**

Hyun Sung Kim\*

*Department of Chemistry, Pukyong National University, Pusan 48513, Republic of Korea*

## SI-1. Chemical Compositions of [MS]-Y<sub>f</sub> and [MSe]-Y<sub>f</sub>

**Table SI-1.** Compositions of [MS]-Y<sub>f</sub> and [MSe]-Y<sub>f</sub>, respectively.

| Zeolite film                        | Composition                                                                                                                       |
|-------------------------------------|-----------------------------------------------------------------------------------------------------------------------------------|
| [PbS]-Y <sub>f</sub>                | Pb <sub>33.4</sub> S <sub>33.0</sub> H <sub>66.0</sub> Na <sub>3.5</sub> Al <sub>70.3</sub> Si <sub>121.7</sub> O <sub>384</sub>  |
| [PbSe]-Y <sub>f</sub>               | Pb <sub>33.1</sub> Se <sub>32.1</sub> H <sub>64.6</sub> Na <sub>3.8</sub> Al <sub>70.3</sub> Si <sub>121.7</sub> O <sub>384</sub> |
| [CdS]-Y <sub>f</sub>                | Cd <sub>33.2</sub> S <sub>33.1</sub> H <sub>66.0</sub> Na <sub>3.5</sub> Al <sub>70.3</sub> Si <sub>121.7</sub> O <sub>384</sub>  |
| [CdSe]-Y <sub>f</sub>               | Cd <sub>33.1</sub> Se <sub>32.0</sub> H <sub>64.6</sub> Na <sub>3.8</sub> Al <sub>70.3</sub> Si <sub>121.7</sub> O <sub>384</sub> |
| [ZnS]-Y <sub>f</sub>                | Zn <sub>33.4</sub> S <sub>33.2</sub> H <sub>66.0</sub> Na <sub>3.5</sub> Al <sub>70.3</sub> Si <sub>121.7</sub> O <sub>384</sub>  |
| [ZnSe]-Y <sub>f</sub>               | Zn <sub>33.1</sub> Se <sub>32.1</sub> H <sub>64.6</sub> Na <sub>3.8</sub> Al <sub>70.3</sub> Si <sub>121.7</sub> O <sub>384</sub> |
| [Ag <sub>2</sub> S]-Y <sub>f</sub>  | Ag <sub>62.7</sub> S <sub>33.0</sub> H <sub>66.0</sub> Na <sub>3.5</sub> Al <sub>70.3</sub> Si <sub>121.7</sub> O <sub>384</sub>  |
| [Ag <sub>2</sub> Se]-Y <sub>f</sub> | Ag <sub>62.7</sub> Se <sub>32.1</sub> H <sub>64.6</sub> Na <sub>3.8</sub> Al <sub>70.3</sub> Si <sub>121.7</sub> O <sub>384</sub> |

## SI 2. Optical band gap of various QDs in Yfs

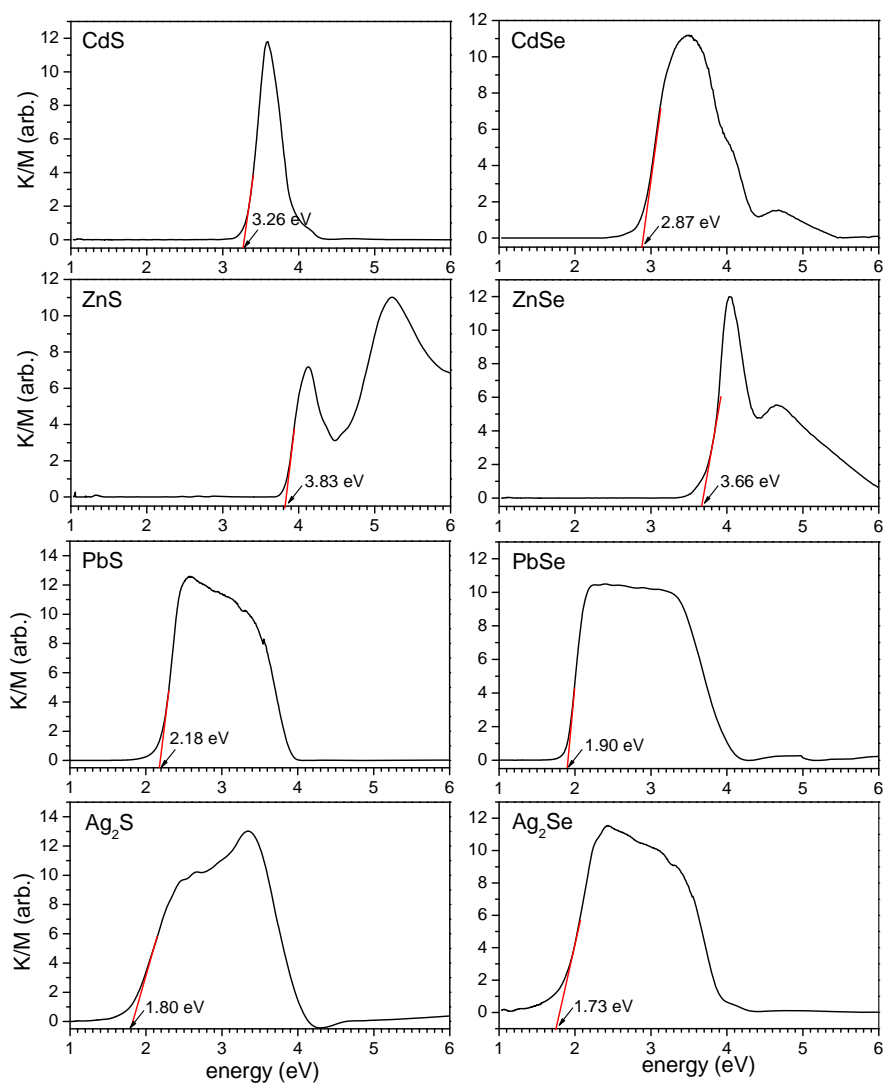

Estimation optical band gap from diffuse reflectance spectra of indicated [MSe or MS]-Yfs respectively.

### SI-3. Cations effect to 3<sup>rd</sup> NLO response of [PbSe]-Yfs

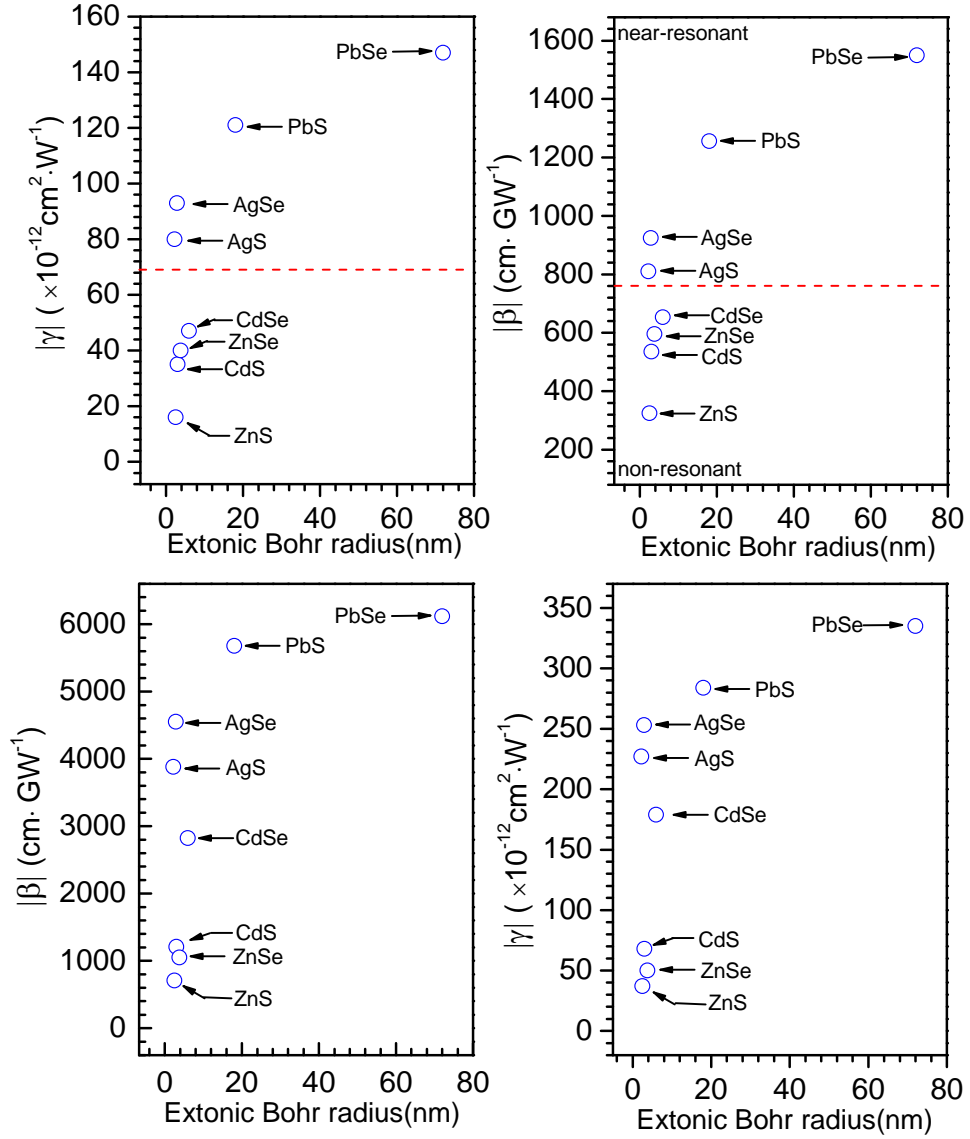

Plots of (right)  $\beta$  and (left)  $\gamma$  measured at (top) 1064 nm and at (bottom) 532 nm vs extonic bohr radius and as indicated [MSe or MS]-Yfs.

#### SI-4. Cations effect to 3<sup>rd</sup> NLO response of [PbSe]-Yfs

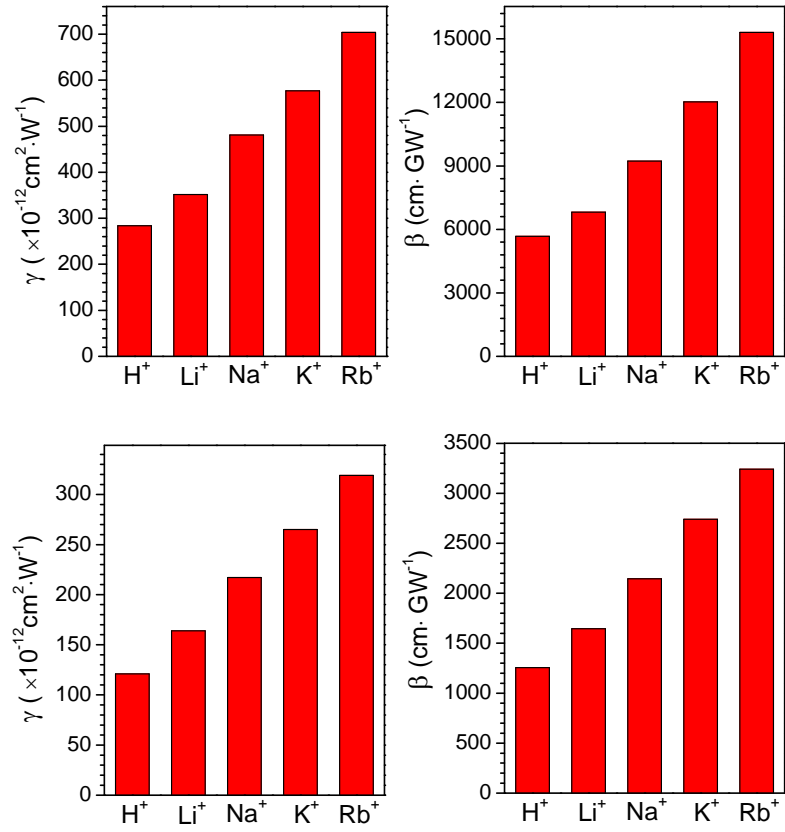

Estimation optical band gap from diffuse reflectance spectra of indicated [MSe or MS]-Yfs respectively.
